# Supplementary material for: Optimized protocol for the extraction of RNA and DNA from frozen whole blood sample stored in a single EDTA tube
Source: PubMed Central journal article supplement (PMC8382694; doi:10.1038/s41598-021-96567-2), 2021-08-23

## **Optimized protocol for the extraction of RNA and DNA from frozen whole blood sample stored in a single EDTA tube**

HirotaKa Yamagata<sup>1,2\*</sup>, Ayumi Kobayashi<sup>1</sup>, Ryouichi Tsunedomi<sup>3</sup>, Tomoe Seki<sup>1,2</sup>, Masaaki Kobayashi<sup>1</sup>, Kosuke Hagiwara<sup>1</sup>, Chong Chen<sup>1</sup>, Shusaku Uchida<sup>2,4</sup>, Go Okada<sup>5</sup>, Manabu Fuchikami<sup>5</sup>, Toshiharu Kamishikiryo<sup>5</sup>, Jun-ichi Iga<sup>6</sup>, Shusuke Numata<sup>7</sup>, Makoto Kinoshita<sup>7</sup>, Takahiro A. Kato<sup>8</sup>, Ryota Hashimoto<sup>9</sup>, Hiroaki Nagano<sup>3</sup>, Yasumasa Okamoto<sup>5</sup>, Shuichi Ueno<sup>6</sup>, Tetsuro Ohmori<sup>7</sup>, & Shin Nakagawa<sup>1</sup>

1 Division of Neuropsychiatry, Department of Neuroscience, Yamaguchi University Graduate School of Medicine, 1-1-1 Minami-kogushi, Ube, Yamaguchi 755-8505, Japan.

2 Core Research for Evolutional Science and Technology (CREST), Japan Science and Technology Agency (JST), 4-1-8 Honcho, Kawaguchi, Saitama 332-0012, Japan.

3 Department of Gastroenterological, Breast and Endocrine Surgery, Yamaguchi University Graduate School of Medicine, 1-1-1 Minami-kogushi, Ube, Yamaguchi 755-8505, Japan.

4 SK Project, Medical Innovation Center, Kyoto University Graduate School of Medicine, 53 Shogoin-Kawahara-cho, Sakyo-ku, Kyoto 606-8507, Japan.

5 Department of Psychiatry and Neurosciences, Graduate School of Biomedical Sciences, Hiroshima University, 1-2-3 Kasumi, Minami-ku, Hiroshima, 734-8551, Japan.

6 Department of Neuropsychiatry, Molecules and Function, Ehime University Graduate School of Medicine, Shitsukawa, Toon, Ehime, 791-0295, Japan.

7 Department of Psychiatry, Graduate School of Biomedical Sciences, Tokushima University, 3-18-5 Kuramoto-cho, Tokushima, 770-8503, Japan.

8 Department of Neuropsychiatry, Graduate School of Medical Sciences, Kyushu University, 3-1-1 Maidashi Higashi-Ku, Fukuoka, 812-8582, Japan.

9 Department of Pathology of Mental Diseases, National Institute of Mental Health, National Center of Neurology and Psychiatry, 4-1-1 Ogawa-Higashi, Kodaira, Tokyo 187-8553, Japan.

\*Correspondence to:

HirotaKa Yamagata, M.D., Ph.D.

Division of Neuropsychiatry, Department of Neuroscience, Yamaguchi University Graduate School of Medicine, 1-1-1 Minami-kogushi, Ube, Yamaguchi 755-8505, Japan

Tel: +81 836 22 2255; Fax: +81 836 22 2253; e-mail: gata@yamaguchi-u.ac.jp

## Supplementary information

Supplementary Table S1. Characteristics of RNA purified from peripheral whole blood sample under different conditions after short-term storage (Participants1). Data are shown as mean  $\pm$  standard deviation. A260/280, absorbance ratio at 260 and 280 nm; A260/230, absorbance ratio at 260 and 230 nm; RIN, RNA integrity number; 28S/18S, 28S-to-18S rRNA ratio.

Supplementary Table S2. Characteristics of RNA purified from peripheral whole blood sample after long-term storage (Participants2). A260/280, absorbance ratio at 260 and 280 nm; A260/230, absorbance ratio at 260 and 230 nm; RIN, RNA integrity number; 28S/18S, 28S-to-18S rRNA ratio.

Supplementary Table S3. Characteristics of DNA purified from peripheral whole blood sample after long-term storage (Participants2). A260/280, absorbance ratio at 260 and 280 nm; A260/230, absorbance ratio at 260 and 230 nm.

Supplementary Table S4. Characteristics of RNA purified from peripheral whole blood sample (Participants3). RIN, RNA integrity number.

Supplementary Table S5. Expression of housekeeping genes in long-term storage samples (Participants2,  $n = 30$ ) and control samples of fresh blood (Participants3,  $n = 10$ ). SD, standard deviation; CV, coefficient of variation.

Supplementary Table S6. Demographic characteristics of the participants. Age is shown as mean  $\pm$  standard deviation.

Supplementary Table S7. Primer sequences used in this study and amplicon lengths.

Supplementary Table S8. Sequences of synthetic DNA.

Supplementary Table S9. Summary of statistical analyses.

Supplementary Fig. S1 Typical electropherograms of purified RNA. Thawing in a water bath increased the RNA degradation in samples P-37 and N-37 of participants 3 and 5.

Supplementary Fig. S2 Gel images of DNA. Agarose gel (1%) imaging was performed using ATTO printgraph and ATTO imageSaver AE-6905C. Five hundred nano grams of DNA was loaded in each lane. Five microliters of GeneRuler 100-bp Plus DNA Ladder (Thermo Fisher Scientific) was used for loading controls and markers.

Supplementary Fig. S3 Gel images of PCR products of GAPDH. Agarose gel (1.2%) imaging was performed using ATTO printgraph and ATTO imageSaver AE-6905C. Three microliters of GeneRuler 100-bp Plus DNA Ladder (Thermo Fisher Scientific) was used for loading controls and markers.

Supplementary Fig. S4 Gel images of PCR products of RPS18. Agarose gel (1.2%) imaging was performed using ATTO printgraph and ATTO imageSaver AE-6905C. Three microliters of GeneRuler 100-bp Plus DNA Ladder (Thermo Fisher Scientific) was used for loading controls and markers.

# Table S1

| protocol | ID | time for thawing (minutes) | A260/A280 | A260/A230 | yeild (ug/mL) by A260 | yeild (ug/mL) by Qubit | RIN | 28S/18S |
|----------|----|----------------------------|-----------|-----------|-----------------------|------------------------|-----|---------|
| P-Con    | 1  | —                          | 2.09      | 1.87      | 2.03                  | 2.13                   | 8.4 | 1.3     |
|          | 2  | —                          | 2.14      | 1.71      | 0.81                  | 0.89                   | 7.9 | 1.9     |
|          | 3  | —                          | 2.14      | 1.51      | 1.91                  | 2.00                   | 6.9 | 1.8     |
|          | 4  | —                          | 2.16      | 1.58      | 0.84                  | 0.98                   | 7.7 | 1.7     |
|          | 5  | —                          | 2.07      | 2.08      | 2.11                  | 1.73                   | 7.3 | 2.0     |
|          | 6  | —                          | 2.12      | 2.02      | 2.02                  | 2.22                   | 8   | 1.9     |
|          | 7  | —                          | 2.11      | 1.56      | 0.86                  | 0.94                   | 9.2 | 1.6     |
| P-37     | 1  | 4.7                        | 2.17      | 1.76      | 1.36                  | 1.48                   | 6.7 | 1.5     |
|          | 2  | 4.7                        | 2.22      | 1.52      | 0.90                  | 1.05                   | 6.4 | 1.4     |
|          | 3  | 5.2                        | 2.42      | 0.24      | 0.91                  | 0.92                   | 4.2 | 1.0     |
|          | 4  | 5.2                        | 3.63      | 0.07      | 0.27                  | 0.16                   | 2.1 | 0.4     |
|          | 5  | 5.3                        | 2.05      | 1.48      | 0.73                  | 0.79                   | 4.5 | 1.1     |
|          | 6  | 5.3                        | 2.11      | 1.89      | 1.08                  | 1.16                   | 6   | 1.3     |
|          | 7  | 5.3                        | 2.15      | 1.32      | 0.60                  | 0.65                   | 6.1 | 1.0     |
| P-AI     | 1  | 18.0                       | 2.2       | 1.44      | 1.22                  | 1.34                   | 7   | 1.5     |
|          | 2  | 18.0                       | 2.17      | 1.89      | 1.68                  | 1.77                   | 7.5 | 1.8     |
|          | 3  | 16.8                       | 2.16      | 1.95      | 2.02                  | 3.59                   | 7.2 | 0.9     |
|          | 4  | 16.8                       | 2.22      | 1.45      | 0.71                  | 0.77                   | 5.3 | 1.4     |
|          | 5  | 18.3                       | 2.22      | 1.75      | 1.24                  | 1.35                   | 6.6 | 1.1     |
|          | 6  | 18.3                       | 2.18      | 1.94      | 1.19                  | 1.18                   | 6.8 | 1.1     |
|          | 7  | 18.3                       | 2.27      | 1.95      | 0.85                  | 0.95                   | 6.1 | 1.3     |
| N-37     | 1  | 4.5                        | 2.04      | 1.64      | 6.93                  | 6.30                   | 6.4 | 0.8     |
|          | 2  | 4.5                        | 2.01      | 1.59      | 5.88                  | 5.40                   | 6.4 | 0.8     |
|          | 3  | 5.3                        | 2         | 1.62      | 6.93                  | 7.06                   | 4.7 | 0.8     |
|          | 4  | 5.3                        | 1.42      | 0.69      | 1.04                  | 0.43                   | 4.2 | 1.6     |
|          | 5  | 4.8                        | 2         | 1.39      | 5.25                  | 4.73                   | 4.6 | 0.9     |
|          | 6  | 4.8                        | 2.08      | 1.79      | 8.26                  | 8.04                   | 6.2 | 0.8     |
|          | 7  | 4.8                        | 1.98      | 1.32      | 6.52                  | 5.82                   | 5.2 | 0.7     |
| N-AI     | 1  | 16.5                       | 2.01      | 1.71      | 7.50                  | 6.47                   | 6.5 | 0.9     |
|          | 2  | 16.5                       | 2.02      | 1.5       | 6.45                  | 5.54                   | 6.2 | 0.9     |
|          | 3  | 17.7                       | 2.01      | 1.72      | 8.36                  | 8.18                   | 6.2 | 0.6     |
|          | 4  | 17.7                       | 1.81      | 1.23      | 2.73                  | 2.60                   | 3.1 | 1.0     |
|          | 5  | 18.5                       | 2         | 1.44      | 6.05                  | 5.60                   | 5.6 | 1.0     |
|          | 6  | 18.5                       | 2         | 1.47      | 9.02                  | 7.87                   | 6.7 | 0.9     |
|          | 7  | 18.5                       | 1.96      | 1.36      | 6.73                  | 5.80                   | 6.3 | 0.6     |
| N-Ice    | 1  | 120                        | 2.05      | 1.68      | 7.17                  | 6.58                   | 6.9 | 1.3     |
|          | 2  | 120                        | 2.03      | 1.5       | 5.70                  | 5.35                   | 6.5 | 0.9     |
|          | 3  | 120                        | 2.04      | 1.7       | 8.41                  | 8.12                   | 6.6 | 1.1     |
|          | 4  | 120                        | 1.64      | 0.82      | 1.54                  | 0.87                   | 2.6 | 1.8     |
|          | 5  | 120                        | 2.02      | 1.42      | 6.55                  | 5.54                   | 5.8 | 1.0     |
|          | 6  | 120                        | 2.11      | 1.79      | 8.06                  | 7.36                   | 6.5 | 0.7     |
|          | 7  | 120                        | 2.05      | 1.54      | 6.20                  | 5.32                   | 5.8 | 0.9     |

## Table S2

| ID     | sex | age | A260/A280 | A260/A230 | Yield ( $\mu\text{g/ml}$ ) | RIN | 28S/18S | Preservation period (years) |
|--------|-----|-----|-----------|-----------|----------------------------|-----|---------|-----------------------------|
| Dep007 | F   | 25  | 2.01      | 1.49      | 6.67                       | 5.9 | 1       | 8.5                         |
| Dep008 | F   | 28  | 2.09      | 1.67      | 8.43                       | 5.8 | 1.3     | 8.5                         |
| Dep029 | M   | 39  | 2.08      | 1.62      | 9.58                       | 5.4 | 1.4     | 8.2                         |
| Dep053 | F   | 36  | 2.10      | 1.45      | 6.46                       | 5.9 | 1       | 7.9                         |
| Dep060 | F   | 39  | 2.01      | 1.58      | 6.95                       | 5.6 | 1.4     | 7.8                         |
| Dep064 | M   | 51  | 2.05      | 1.47      | 5.13                       | 5.1 | 1.3     | 7.7                         |
| Dep077 | M   | 44  | 2.08      | 1.94      | 11.90                      | 6   | 0.9     | 7.6                         |
| Dep085 | F   | 42  | 2.06      | 1.33      | 8.50                       | 5.8 | 1.5     | 7.5                         |
| Dep093 | M   | 41  | 2.10      | 1.83      | 13.96                      | 6.4 | 1.7     | 7.4                         |
| Dep103 | F   | 28  | 2.02      | 1.72      | 9.50                       | 6.6 | 1.1     | 7.3                         |
| Dep130 | M   | 47  | 2.05      | 1.77      | 8.00                       | 5.3 | 1.4     | 6.7                         |
| Dep135 | F   | 46  | 2.09      | 1.86      | 10.60                      | 4.7 | 0.9     | 6.6                         |
| Dep137 | M   | 33  | 2.06      | 1.96      | 16.98                      | 4.7 | 0.7     | 6.5                         |
| Dep140 | F   | 33  | 2.04      | 1.76      | 10.19                      | 7   | 1.5     | 6.5                         |
| Dep142 | M   | 55  | 2.05      | 1.48      | 9.33                       | 7.1 | 1.2     | 6.5                         |
| Dep147 | F   | 27  | 2.05      | 1.65      | 6.82                       | 5.6 | 1.1     | 6.4                         |
| Dep153 | F   | 41  | 2.03      | 1.70      | 8.71                       | 7   | 1.3     | 6.3                         |
| Dep166 | F   | 41  | 2.07      | 1.22      | 6.98                       | 6.7 | 0.6     | 6.0                         |
| Dep169 | F   | 27  | 2.06      | 1.40      | 5.42                       | 5.3 | 1       | 6.0                         |
| Dep172 | M   | 29  | 2.10      | 1.92      | 15.59                      | 5   | 0.9     | 5.9                         |
| Dep173 | M   | 43  | 2.06      | 1.60      | 6.73                       | 5.5 | 1       | 5.8                         |
| Dep176 | M   | 40  | 2.06      | 1.86      | 10.46                      | 6.5 | 1       | 5.8                         |
| Dep180 | M   | 28  | 2.02      | 1.55      | 6.35                       | 7.1 | 1.8     | 5.6                         |
| Dep183 | F   | 43  | 2.05      | 1.78      | 10.64                      | 4.9 | 0.9     | 5.5                         |
| Dep211 | F   | 39  | 2.05      | 1.45      | 7.84                       | 5.7 | 1.1     | 5.1                         |
| Dep215 | M   | 34  | 2.04      | 1.76      | 10.42                      | 7.4 | 1.3     | 5.0                         |
| FD010  | F   | 39  | 2.01      | 1.57      | 6.16                       | 7.3 | 1.8     | 2.6                         |
| FD014  | M   | 25  | 2.10      | 1.61      | 10.97                      | 5.5 | 1       | 2.5                         |
| FD016  | F   | 33  | 2.04      | 1.75      | 8.87                       | 6.9 | 1.3     | 2.5                         |
| FD020  | M   | 31  | 2.04      | 1.71      | 7.87                       | 4.7 | 1       | 2.4                         |



# Table S3

| ID     | sex | age | A260/A280 | A260/A230 | Yield ( $\mu$ g/ml) | Preservation period (years) |
|--------|-----|-----|-----------|-----------|---------------------|-----------------------------|
| Dep007 | F   | 25  | 1.94      | 2.62      | 14.8                | 8.5                         |
| Dep008 | F   | 28  | 1.93      | 2.40      | 18.7                | 8.5                         |
| Dep029 | M   | 39  | 1.93      | 2.45      | 24.0                | 8.2                         |
| Dep053 | F   | 36  | 1.92      | 2.37      | 15.9                | 7.9                         |
| Dep060 | F   | 39  | 1.94      | 2.47      | 13.8                | 7.8                         |
| Dep064 | M   | 51  | 1.91      | 2.45      | 15.3                | 7.7                         |
| Dep077 | M   | 44  | 1.96      | 2.65      | 15.1                | 7.6                         |
| Dep085 | F   | 42  | 1.91      | 2.41      | 21.6                | 7.5                         |
| Dep093 | M   | 41  | 1.93      | 2.45      | 15.3                | 7.4                         |
| Dep103 | F   | 28  | 1.94      | 2.54      | 18.5                | 7.3                         |
| Dep130 | M   | 47  | 1.95      | 2.64      | 22.7                | 6.7                         |
| Dep135 | F   | 46  | 1.91      | 2.38      | 16.6                | 6.6                         |
| Dep137 | M   | 33  | 1.94      | 2.53      | 17.1                | 6.5                         |
| Dep140 | F   | 33  | 1.91      | 2.36      | 25.6                | 6.5                         |
| Dep142 | M   | 55  | 1.93      | 2.45      | 15.4                | 6.5                         |
| Dep147 | F   | 27  | 1.93      | 2.43      | 16.6                | 6.4                         |
| Dep153 | F   | 41  | 1.91      | 2.34      | 25.9                | 6.3                         |
| Dep166 | F   | 41  | 1.91      | 2.45      | 18.9                | 6.0                         |
| Dep169 | F   | 27  | 1.90      | 2.39      | 11.8                | 6.0                         |
| Dep172 | M   | 29  | 1.93      | 2.49      | 13.8                | 5.9                         |
| Dep173 | M   | 43  | 1.90      | 2.49      | 17.3                | 5.8                         |
| Dep176 | M   | 40  | 1.90      | 2.41      | 25.1                | 5.8                         |
| Dep180 | M   | 28  | 1.91      | 2.47      | 14.7                | 5.6                         |
| Dep183 | F   | 43  | 1.91      | 2.38      | 22.0                | 5.5                         |
| Dep211 | F   | 39  | 1.90      | 2.45      | 22.2                | 5.1                         |
| Dep215 | M   | 34  | 1.92      | 2.54      | 12.2                | 5.0                         |
| FD010  | F   | 39  | 1.94      | 2.49      | 13.8                | 2.6                         |
| FD014  | M   | 25  | 1.93      | 2.54      | 20.7                | 2.5                         |
| FD016  | F   | 33  | 1.96      | 2.51      | 12.6                | 2.5                         |
| FD020  | M   | 31  | 1.94      | 2.43      | 26.8                | 2.4                         |

# Table S4

| ID  | sex | age | Concentration ( $\mu\text{g/mL}$ ) | RIN |
|-----|-----|-----|------------------------------------|-----|
| t1  | F   | 25  | 100.0                              | 8.5 |
| t2  | M   | 28  | 79.8                               | 8.7 |
| t3  | M   | 39  | 92.0                               | 8.4 |
| t4  | M   | 36  | 70.4                               | 8.7 |
| t5  | F   | 39  | 94.2                               | 8.6 |
| t6  | M   | 51  | 108.6                              | 8.6 |
| t7  | F   | 44  | 83.6                               | 8.8 |
| t8  | F   | 42  | 50.2                               | 8.3 |
| t9  | F   | 41  | 43.0                               | 7.8 |
| t10 | M   | 28  | 80.4                               | 7.2 |

Table S5

| genes         | Participants2 |         |      | Participants3 |         |      | corrected<br>p-values of<br>F-test |
|---------------|---------------|---------|------|---------------|---------|------|------------------------------------|
|               | Mean<br>(TPM) | SD      | CV   | Mean<br>(TPM) | SD      | CV   |                                    |
| <i>ACTB</i>   | 2530.19       | 596.71  | 0.24 | 774.78        | 596.57  | 0.77 | 2.0.E-05                           |
| <i>ALAS1</i>  | 9.34          | 2.80    | 0.30 | 10.83         | 4.42    | 0.41 | 1.000                              |
| <i>ATP5F1</i> | 30.77         | 9.44    | 0.31 | 32.98         | 12.41   | 0.38 | 1.000                              |
| <i>B2M</i>    | 4287.65       | 1188.12 | 0.28 | 4330.86       | 1372.86 | 0.32 | 1.000                              |
| <i>G6PD</i>   | 25.33         | 6.37    | 0.25 | 11.81         | 7.29    | 0.62 | 4.4.E-03                           |
| <i>GAPDH</i>  | 345.33        | 91.27   | 0.26 | 288.59        | 122.27  | 0.42 | 1.000                              |
| <i>GUSB</i>   | 11.15         | 2.96    | 0.27 | 6.62          | 2.85    | 0.43 | 1.000                              |
| <i>HMBS</i>   | 6.24          | 1.06    | 0.17 | 9.53          | 2.11    | 0.22 | 1.000                              |
| <i>HPRT1</i>  | 6.58          | 2.01    | 0.31 | 5.20          | 2.64    | 0.51 | 0.838                              |
| <i>IPO8</i>   | 11.89         | 3.60    | 0.30 | 10.00         | 4.53    | 0.45 | 1.000                              |
| <i>PGK1</i>   | 81.94         | 22.28   | 0.27 | 136.64        | 55.84   | 0.41 | 1.000                              |
| <i>POLR2A</i> | 22.11         | 7.31    | 0.33 | 7.23          | 6.65    | 0.92 | 4.7.E-04                           |
| <i>PPIA</i>   | 68.97         | 21.35   | 0.31 | 58.57         | 21.25   | 0.36 | 1.000                              |
| <i>RPL13A</i> | 898.94        | 240.66  | 0.27 | 535.97        | 184.30  | 0.34 | 1.000                              |
| <i>RPLP0</i>  | 370.98        | 103.78  | 0.28 | 319.62        | 99.42   | 0.31 | 1.000                              |
| <i>RPLP1</i>  | 487.64        | 157.09  | 0.32 | 101.21        | 106.98  | 1.06 | 1.8.E-05                           |
| <i>RPLP2</i>  | 1190.20       | 257.46  | 0.22 | 816.98        | 280.86  | 0.34 | 1.000                              |
| <i>RPS18</i>  | 1254.58       | 365.46  | 0.29 | 550.45        | 186.51  | 0.34 | 1.000                              |
| <i>SDHA</i>   | 17.93         | 4.69    | 0.26 | 14.82         | 8.96    | 0.60 | 0.012                              |
| <i>TBP</i>    | 5.66          | 1.85    | 0.33 | 3.72          | 1.86    | 0.50 | 1.000                              |
| <i>TFRC</i>   | 50.36         | 10.93   | 0.22 | 13.30         | 3.85    | 0.29 | 1.000                              |
| <i>UBC</i>    | 101.02        | 29.35   | 0.29 | 184.46        | 63.82   | 0.35 | 1.000                              |
| <i>YWHAZ</i>  | 249.88        | 76.32   | 0.31 | 139.48        | 65.28   | 0.47 | 1.000                              |

## Table S6

|                                               | number | sex (Male/Female) | age        |
|-----------------------------------------------|--------|-------------------|------------|
| Participants1 for RNA<br>(short-term storage) | n = 7  | 3/4               | 38.6 ± 8.3 |
| Participants1 for DNA<br>(short-term storage) | n = 6  | 2/4               | 37.5 ± 8.5 |
| Participants2<br>(long-term storage)          | n = 30 | 14/16             | 36.9 ± 7.9 |
| Participants3<br>(Fresh blood)                | n = 10 | 5/5               | 53.7 ± 8.9 |

## Table S7

|              |                  |                      |
|--------------|------------------|----------------------|
| <i>GAPDH</i> | Forward          | CAGCCTCAAGATCATCAGCA |
|              | Reverse          | TGTGGTCATGAGTCCTTCCA |
|              | amplicon lengths | 106 base pairs       |
| <i>RPS18</i> | Forward          | CACTTCTGGGGCCTTCGTG  |
|              | Reverse          | TTCTTGGACACACCCACGGT |
|              | amplicon lengths | 80 base pairs        |

## Table S8

|              |                                                                                                                                                                                                                                                                              |
|--------------|------------------------------------------------------------------------------------------------------------------------------------------------------------------------------------------------------------------------------------------------------------------------------|
| <i>GAPDH</i> | TGTTTCGTCATGGGTGTGAACCATGAGAAGTATGACAACAGCCTCAAGATCATCAGCAATGC<br>CTCCTGCACCACCAACTGCTTAGCACCCCTGGCCAAGGTCATCCATGACAACCTTTGGTATC<br>GTGGAAGGACTCATGACCACAGTCCATGCCATCACTGCCACCCAGAAGACTGTGGATGGC<br>CCCTCCGGGAAACTGTGGCGTGATGGCCGCGGGGCTCTCCAGAACATCATCCCTGCCTCT<br>ACTGGCGC |
| <i>RPS18</i> | ACAGACAGAAGGATGTAAAGGATGGAAAATACAGCCAGGTCCTAGCCAATGGTCTGGACAA<br>CAAGCTCCGTGAAGACCTGGAGCGACTGAAGAAGATTTCGGGCCCATAGAGGGCTGCGTCA<br>CTTCTGGGGCCTTCGTGTCCGAGGCCAGCACACCAAGACCACTGGCCGCCGTGGCCGCAC<br>CGTGGGTGTGTCCAAGAAGAAATAAGTCTGTAGGCCTTGTCTGTTAATAAATAGTTTATAT<br>ACCTATGG  |

# Table S9

| Measurement  | Statistical test           | Comparison               | Statistics        | P value  | Figures and Tables |
|--------------|----------------------------|--------------------------|-------------------|----------|--------------------|
| Yield of RNA | 2-way ANOVA                | Factor1:<br>thawing      | $F(1,24) = 1.11$  | 0.302    | Fig. 2a            |
|              |                            | Factor2:<br>kit          | $F(1,24) = 53.75$ | 1.40E-07 |                    |
|              |                            | Interaction<br>(F1 x F2) | $F(1,24) = 0.003$ | 0.957    |                    |
| RIN          | 2-way ANOVA                | Factor1:<br>thawing      | $F(1,24) = 4.53$  | 0.044    | Fig. 2b            |
|              |                            | Factor2:<br>kit          | $F(1,24) = 0.45$  | 0.511    |                    |
|              |                            | Interaction<br>(F1 x F2) | $F(1,24) = 1.46$  | 0.239    |                    |
| Yield of RNA | Repeated<br>measures ANOVA |                          | $F(2,12) = 6.76$  | 0.011    | Fig. 2c            |
|              | <i>post-hoc</i> test       | N-37 vs N-AI             |                   | 0.014    |                    |
|              |                            | N-37 vs N-Ice            |                   | 0.588    |                    |
|              |                            | N-AI vs N-Ice            |                   | 0.256    |                    |
| RIN          | Repeated<br>measures ANOVA |                          | $F(2,12) = 1.16$  | 0.107    | Fig. 2d            |
|              | <i>post-hoc</i> test       | N-37 vs N-AI             |                   | 0.310    |                    |
|              |                            | N-37 vs N-Ice            |                   | 1        |                    |
|              |                            | N-AI vs N-Ice            |                   | 0.390    |                    |

|               |                         |                |                   |          |         |
|---------------|-------------------------|----------------|-------------------|----------|---------|
| <i>GAPDH</i>  | Repeated measures ANOVA |                | $F(5,30) = 8.57$  | 3.90E-05 | Fig. 3a |
|               | <i>post-hoc</i> test    | P-Con vs P-37  |                   | 0.001    |         |
|               |                         | P-Con vs P-AI  |                   | 1        |         |
|               |                         | P-Con vs N-37  |                   | 0.171    |         |
|               |                         | P-Con vs N-AI  |                   | 1        |         |
|               |                         | P-Con vs N-Ice |                   | 0.596    |         |
|               |                         | P-37 vs P-AI   |                   | 0.036    |         |
|               |                         | P-37 vs N-37   |                   | 0.495    |         |
|               |                         | P-37 vs N-AI   |                   | 0.495    |         |
|               |                         | P-37 vs N-Ice  |                   | 0.391    |         |
|               |                         | P-AI vs N-37   |                   | 0.484    |         |
|               |                         | P-AI vs N-AI   |                   | 1        |         |
|               |                         | P-AI vs N-Ice  |                   | 1        |         |
|               |                         | N-37 vs N-AI   |                   | 0.807    |         |
|               |                         | N-37 vs N-Ice  |                   | 1        |         |
| N-AI vs N-Ice |                         | 1              |                   |          |         |
| <i>RPS18</i>  | Repeated measures ANOVA |                | $F(5,30) = 14.91$ | 2.30E-07 | Fig. 3b |
|               | <i>post-hoc</i> test    | P-Con vs P-37  |                   | 8.90E-04 |         |
|               |                         | P-Con vs P-AI  |                   | 0.260    |         |
|               |                         | P-Con vs N-37  |                   | 1        |         |
|               |                         | P-Con vs N-AI  |                   | 0.448    |         |
|               |                         | P-Con vs N-Ice |                   | 0.495    |         |
|               |                         | P-37 vs P-AI   |                   | 0.068    |         |
|               |                         | P-37 vs N-37   |                   | 0.027    |         |
|               |                         | P-37 vs N-AI   |                   | 0.033    |         |
|               |                         | P-37 vs N-Ice  |                   | 0.052    |         |
|               |                         | P-AI vs N-37   |                   | 0.156    |         |
|               |                         | P-AI vs N-AI   |                   | 0.066    |         |
|               |                         | P-AI vs N-Ice  |                   | 0.122    |         |
|               |                         | N-37 vs N-AI   |                   | 1        |         |
|               |                         | N-37 vs N-Ice  |                   | 0.540    |         |
| N-AI vs N-Ice |                         | 1              |                   |          |         |
| Yield of DNA  | Repeated measures ANOVA |                | $F(2,10) = 14.20$ | 0.001    | Fig. 4  |
|               | <i>post-hoc</i> test    | Q-37 vs Q-AI   |                   | 0.023    |         |
|               |                         | Q-37 vs Q-Ice  |                   | 0.353    |         |
|               |                         | Q-AI vs Q-Ice  |                   | 0.021    |         |

|               |                |                                   |                 |           |          |
|---------------|----------------|-----------------------------------|-----------------|-----------|----------|
| <i>ACTB</i>   | F-test         | Participants2 vs<br>Participants3 | F(9,29) = 10.66 | 2.04E-05  | Table S4 |
| <i>ALAS1</i>  |                |                                   | F(9,29) = 1.85  | 1         |          |
| <i>ATP5F1</i> |                |                                   | F(9,29) = 1.50  | 1         |          |
| <i>B2M</i>    |                |                                   | F(9,29) = 1.31  | 1         |          |
| <i>G6PD</i>   |                |                                   | F(9,29) = 6.02  | 4.45.E-03 |          |
| <i>GAPDH</i>  |                |                                   | F(9,29) = 2.57  | 1         |          |
| <i>GUSB</i>   |                |                                   | F(9,29) = 2.62  | 1         |          |
| <i>HMBS</i>   |                |                                   | F(9,29) = 1.70  | 1         |          |
| <i>HPRT1</i>  |                |                                   | F(9,29) = 2.76  | 0.838     |          |
| <i>IPO8</i>   |                |                                   | F(9,29) = 2.24  | 1         |          |
| <i>PGK1</i>   |                |                                   | F(9,29) = 2.26  | 1         |          |
| <i>POLR2A</i> |                |                                   | F(9,29) = 7.75  | 4.73.E-04 |          |
| <i>PPIA</i>   |                |                                   | F(9,29) = 1.37  | 1         |          |
| <i>RPL13A</i> |                |                                   | F(9,29) = 1.65  | 1         |          |
| <i>RPLP0</i>  |                |                                   | F(9,29) = 1.24  | 1         |          |
| <i>RPLP1</i>  |                |                                   | F(9,29) = 10.77 | 1.84E-05  |          |
| <i>RPLP2</i>  |                |                                   | F(9,29) = 2.53  | 1         |          |
| <i>RPS18</i>  |                |                                   | F(9,29) = 1.36  | 1         |          |
| <i>SDHA</i>   |                |                                   | F(9,29) = 5.34  | 0.012     |          |
| <i>TBP</i>    |                |                                   | F(9,29) = 2.32  | 1         |          |
| <i>TFRC</i>   |                |                                   | F(9,29) = 1.78  | 1         |          |
| <i>UBC</i>    | F(9,29) = 1.42 | 1                                 |                 |           |          |
| <i>YWHAZ</i>  | F(9,29) = 2.35 | 1                                 |                 |           |          |

Figure S1

P-Con ID3

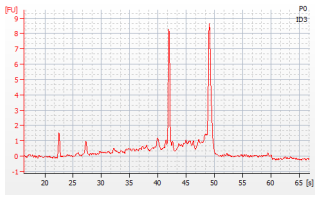

P-37 ID3

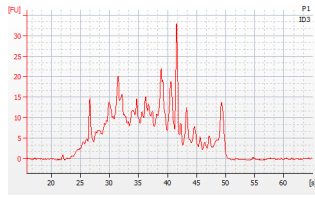

P-AI ID3

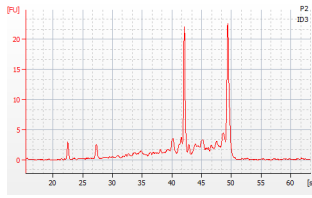

N-37 ID3

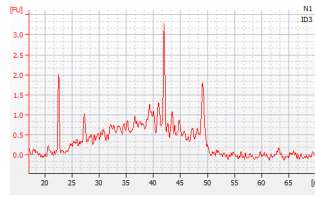

N-AI ID3

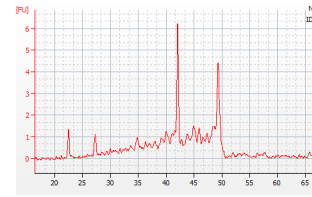

N-Ice ID3

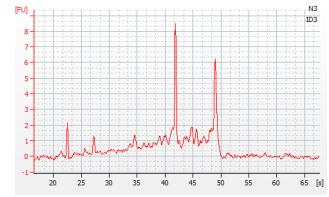

P-Con ID5

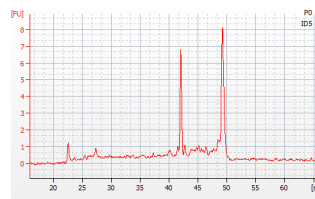

P-37 ID5

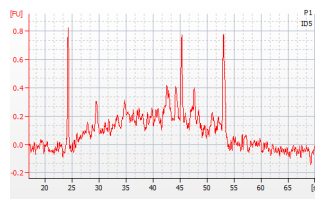

P-AI ID5

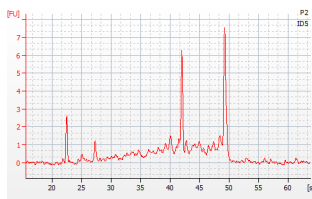

N-37 ID5

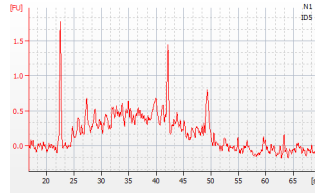

N-AI ID5

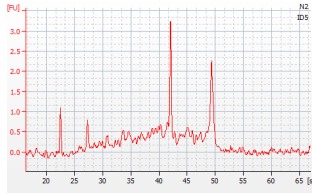

N-Ice ID5

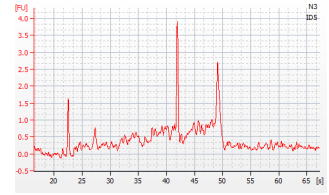



Figure S2

Gel images of DNA

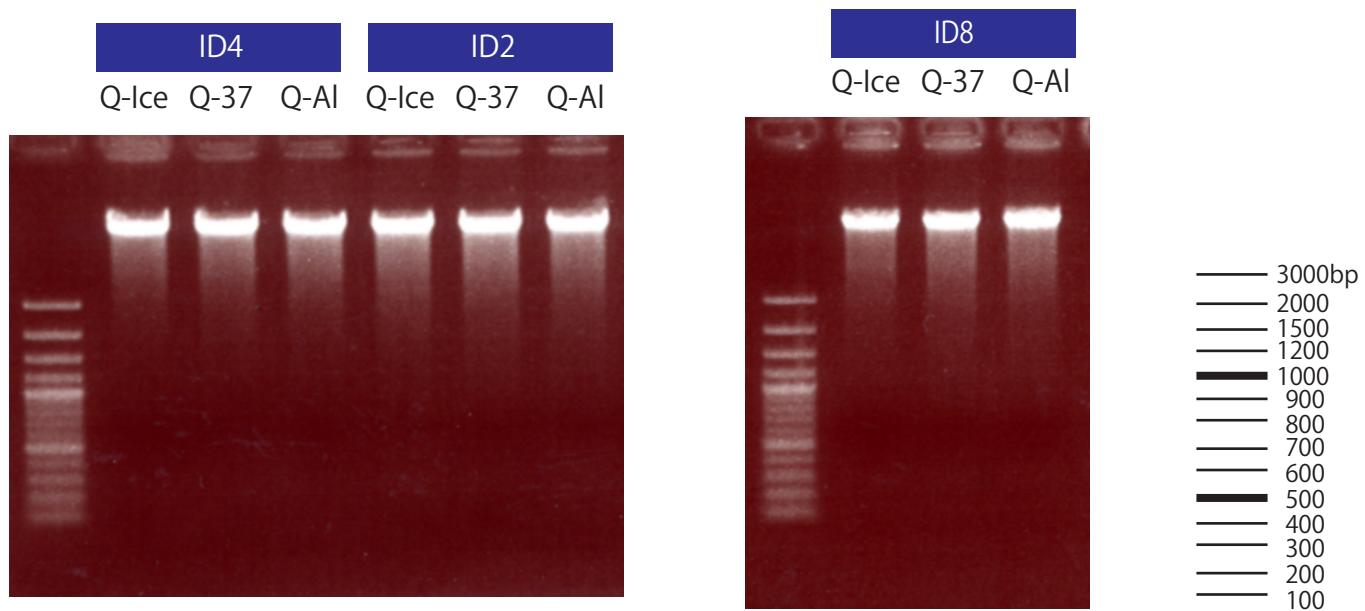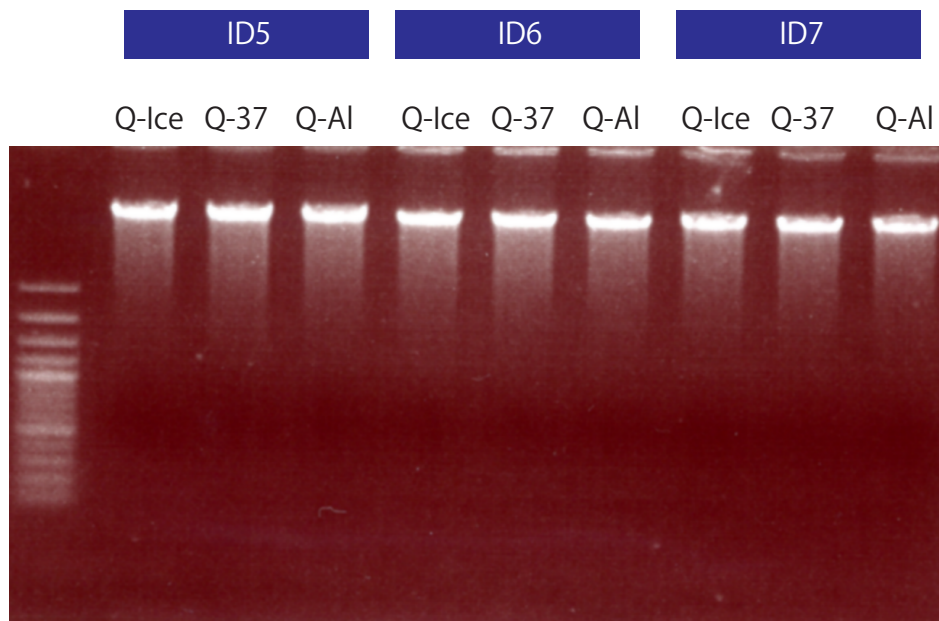

Figure S3 Gel images of PCR products of GAPDH

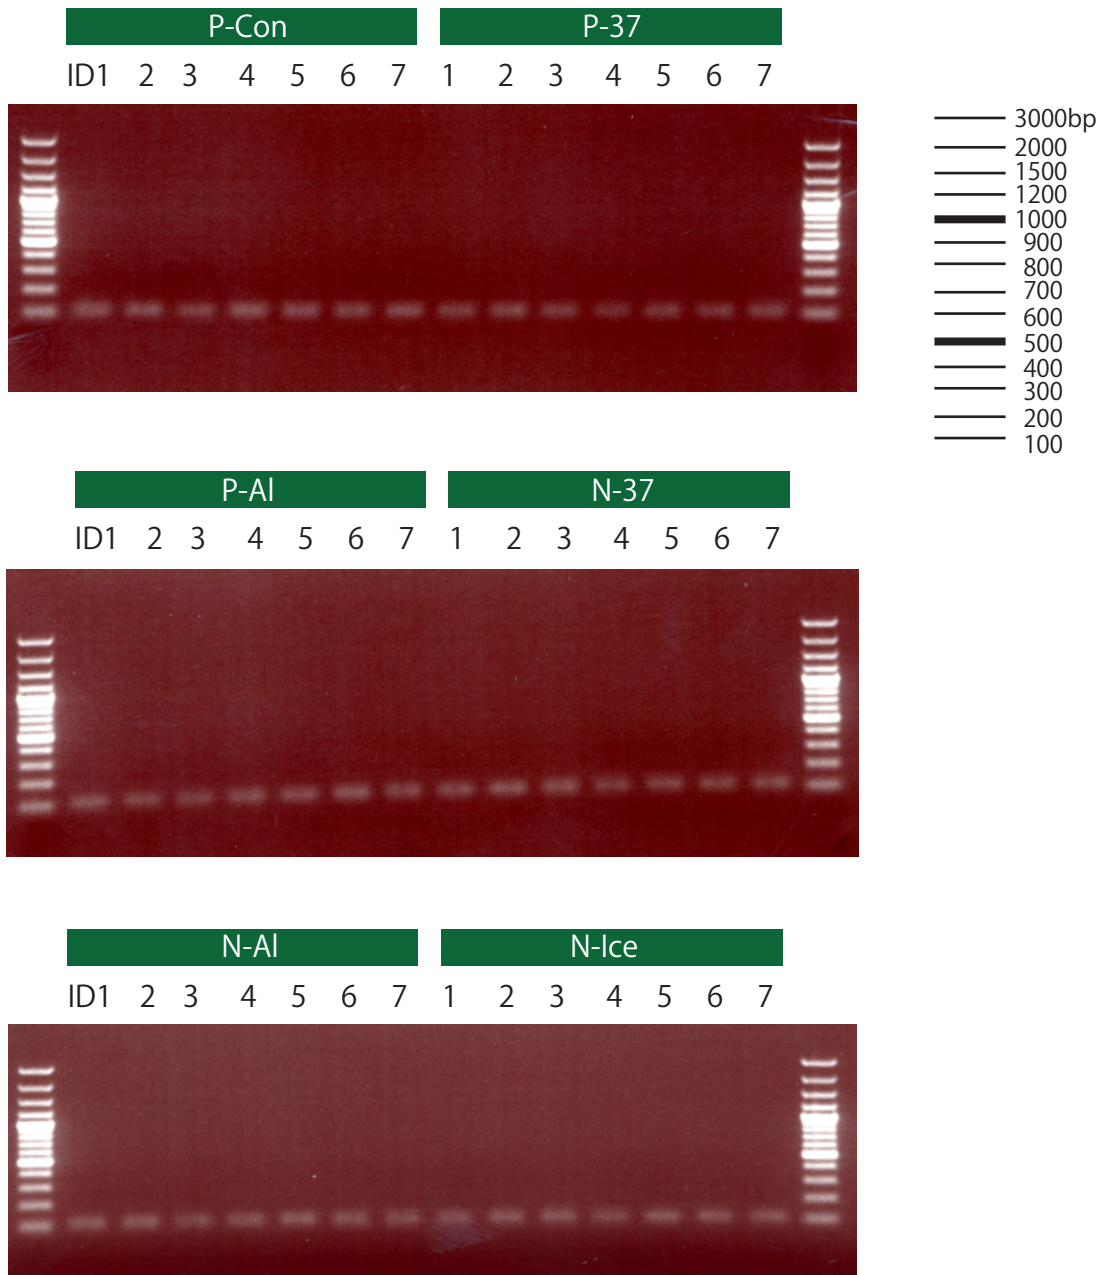

Figure S4 Gel images of PCR products of RPS18

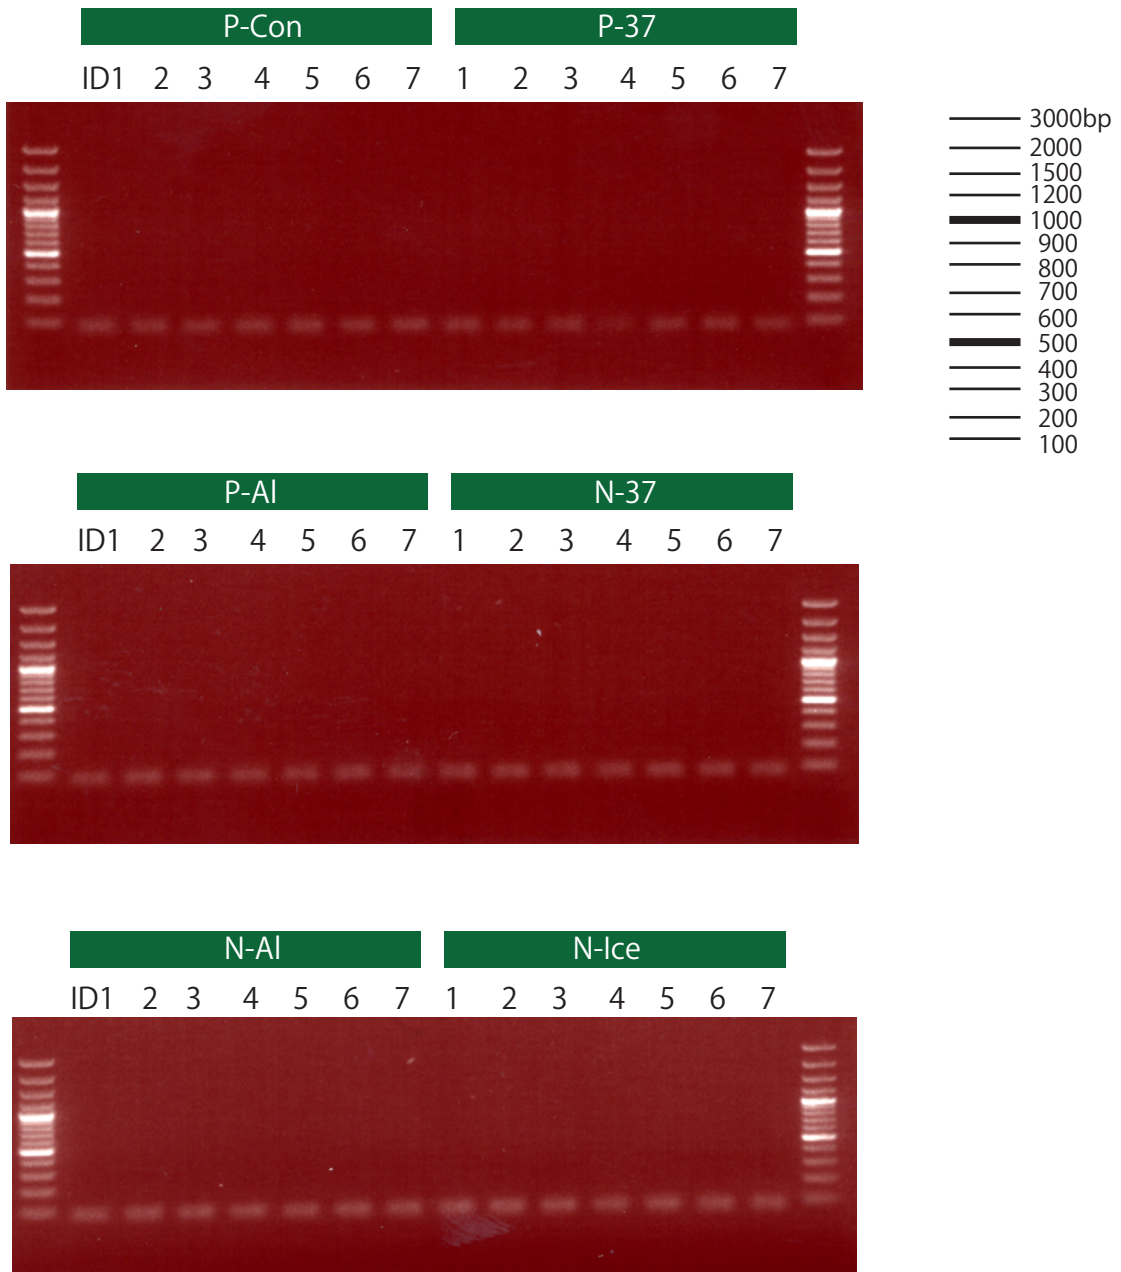

Supplement: 41598_2021_96567_MOESM1_ESM.pdf [file 41598_2021_96567_MOESM1_ESM.pdf]
